# Supplementary material
Source: PubMed Central journal article supplement (PMC4503318)
Supplement: NIHMS695881-supplement.pdf [file NIHMS695881-supplement.pdf]

**Supplemental Information**

**Structural Basis for Specific Inhibition  
of tRNA Synthetase  
by an ATP Competitive Inhibitor**

**Pengfei Fang<sup>1,\*</sup>, Hongyan Han<sup>1,3</sup>, Jing Wang<sup>1</sup>, Kaige Chen<sup>1</sup>, Xin Chen<sup>1</sup>, Min Guo<sup>1,2,\*</sup>**

**This file contains:**

**Figures S1 to S4**

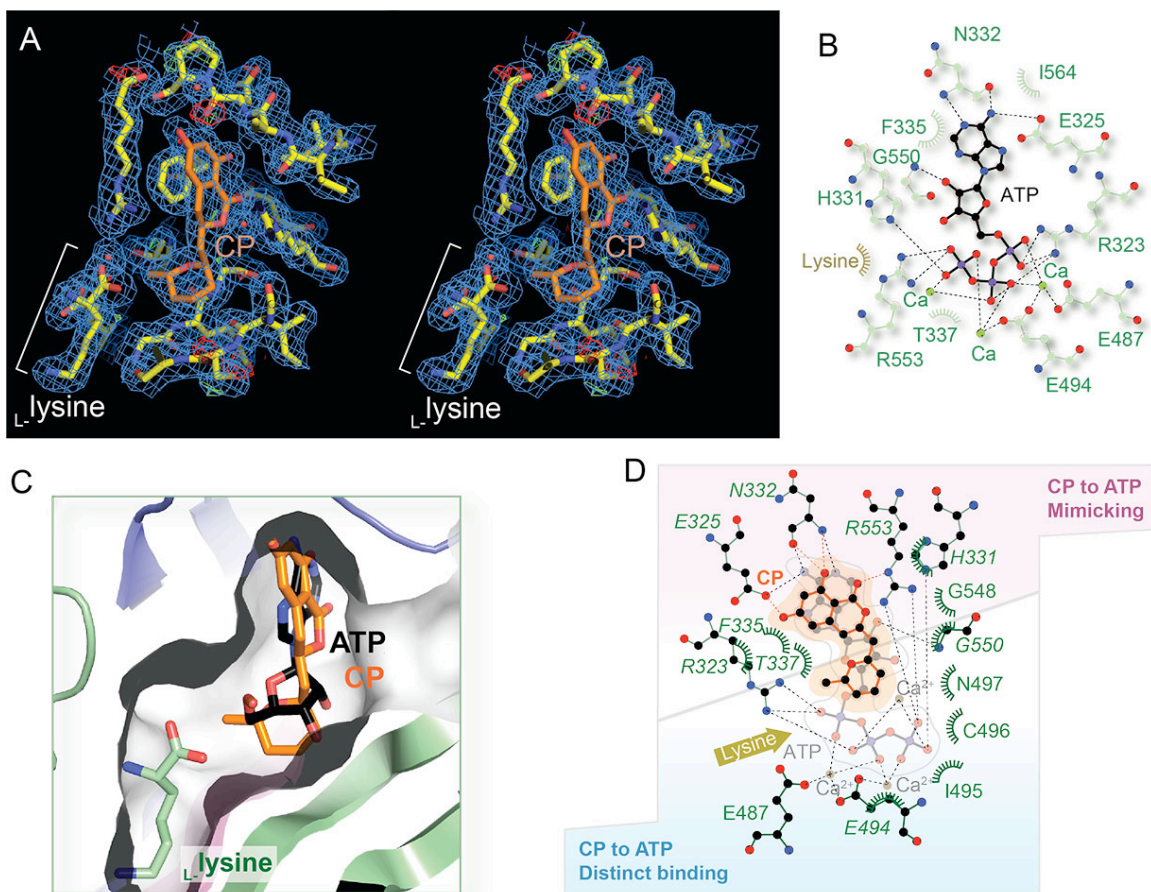

**Figure S1. Cladosporin Occupies ATP Binding Site in Human LysRS, Related to Figure 1.**

**A.** Stereo view of the cladosporin (CP) binding site in human LysRS (*HsLysRS*). LysRS residues within 5 Å of CP are shown in yellow. CP is shown in orange. 2Fo-Fc electron density is colored in blue at 1.0  $\sigma$ . Fo-Fc electron density is shown at  $\pm$  3.0  $\sigma$ , and colored in green and red for positive and negative peaks, respectively. **B.** Schematic presentation of ATP binding in *HsLysRS*. ATP and hydrogen-bonding residues are shown in stick representations, and other residues within 4.5 Å of ATP are shown in light green. **C.** Superimposition of CP and ATP bound complex structures. CP is shown as orange sticks. ATP is shown as black sticks. The enzymatic pocket of *HsLysRS* is shown as white surface, and the protein chain is shown as cartoon. **D.** Overlapped schematic presentations of CP and ATP binding in *HsLysRS*. Shared interacting residues are shown as italic. Half of CP is mimicking ATP, the other half is recognized by interactions distinct from ATP. For **B**, **C** and **D**, the *HsLysRS*-ATP structure is from pdb: 3BJU.

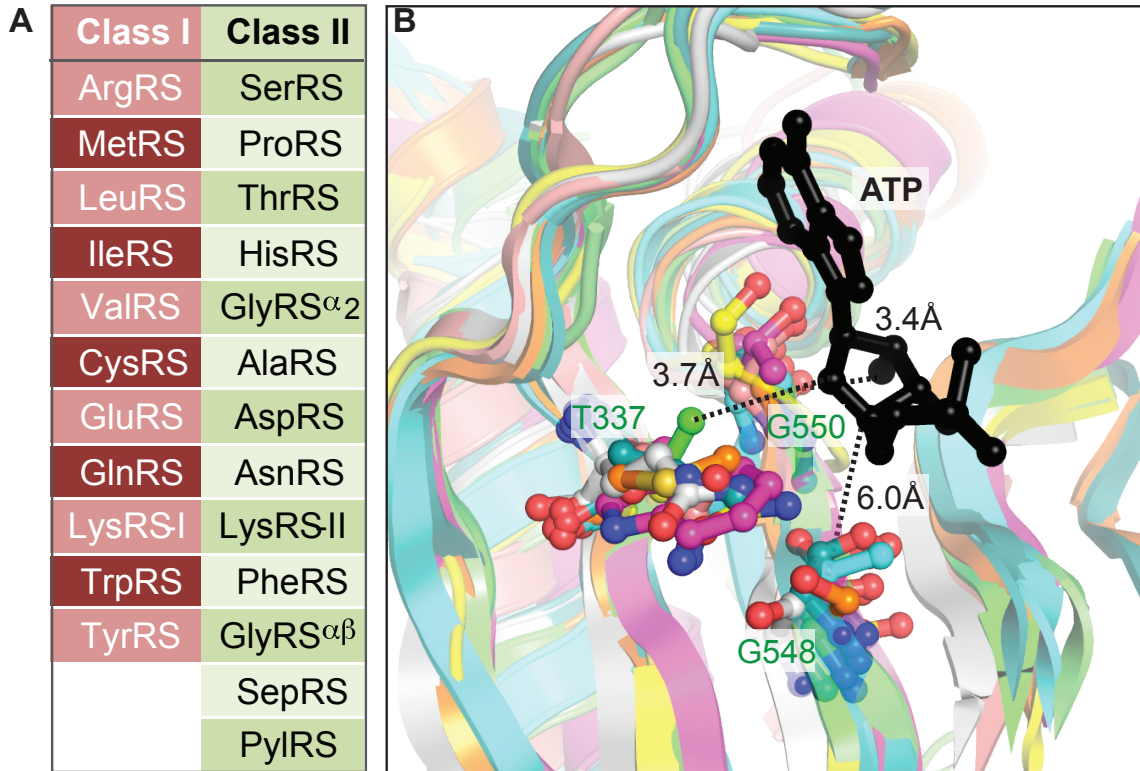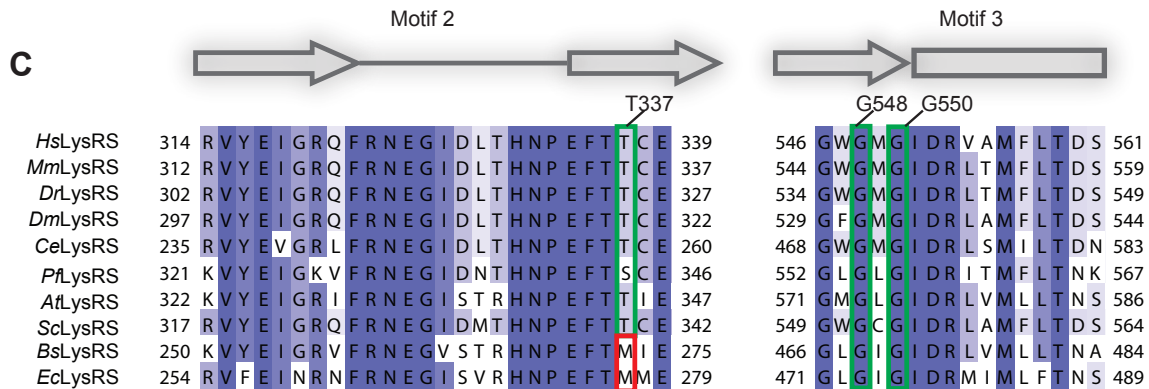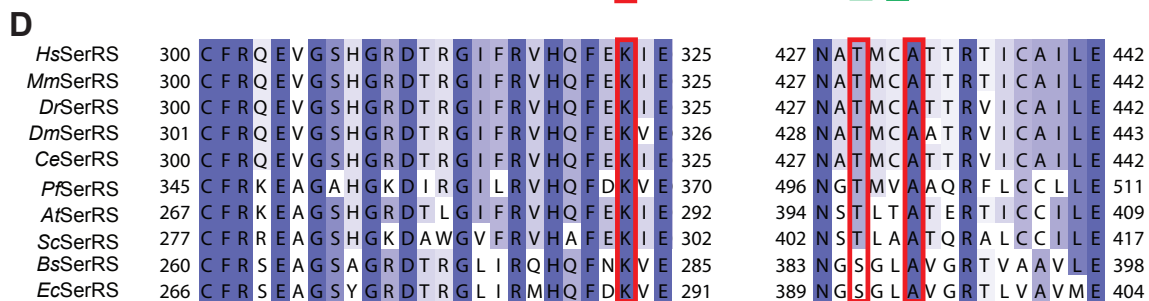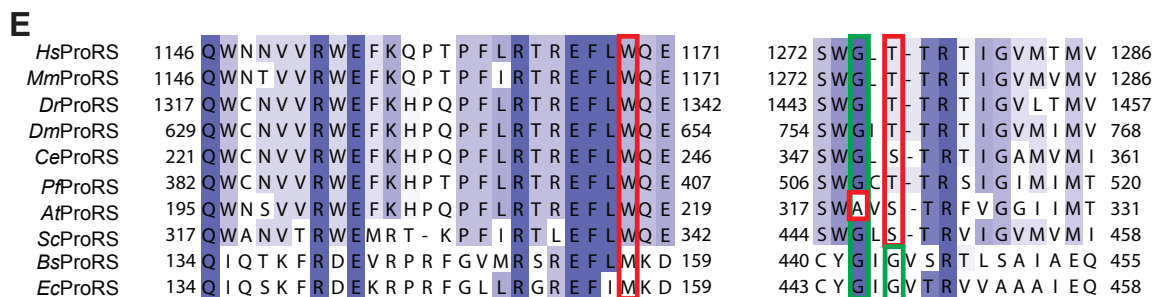

**F**

|                 |     |                                      |     |     |                            |     |
|-----------------|-----|--------------------------------------|-----|-----|----------------------------|-----|
| <i>Hs</i> ThrRS | 437 | FGV LHRNEL SGAL TGLTRVRR FQ QDD      | 462 | 590 | HRA I LGS VERM I A I LT    | 605 |
| <i>Mm</i> ThrRS | 436 | FGV LHRNEL SGAL TGLTRVRR FQ QDD      | 461 | 589 | HRA I LGS VERM I A I LT    | 604 |
| <i>Dr</i> ThrRS | 432 | FGV LHRNEL SGAL TGLTRVRR FQ QDD      | 457 | 585 | HRA I LGS VERM I A I LT    | 600 |
| <i>Dm</i> ThrRS | 463 | FGV LHRNEL SGAL TGLTRVRR FQ QDD      | 488 | 615 | HRA I LGS VERM I A I LT    | 630 |
| <i>Ce</i> ThrRS | 395 | FGV LHRNEL SGAL TGLTRVRR FQ QDD      | 420 | 548 | HRA V LGS VERM T A I LT    | 563 |
| <i>Pf</i> ThrRS | 645 | FGV LHRNE I S G S L SGLTRVRR FQ QDD  | 670 | 868 | HRA I LGS VER F V A I L I  | 883 |
| <i>At</i> ThrRS | 431 | FGV LHRNEA S G A L SGLTRVRR FQ QDD   | 456 | 584 | HRA V LGS VERM F A I L L   | 599 |
| <i>Sc</i> ThrRS | 444 | FGV I HRNE F S G A L SGLTRVRR FQ QDD | 469 | 599 | HRA I LGS VERM T A I LT    | 614 |
| <i>Bs</i> ThrRS | 359 | FGQV HRHE F S G A L NGL LRVRS FQ QDD | 384 | 511 | HRA V FGS LDR F L G I I T  | 526 |
| <i>Ec</i> ThrRS | 358 | FGNCHRN E P S G S L HGLMRVRG F T QDD | 383 | 511 | HRA I LGS M E R F I G I LT | 526 |

**G**

|                 |     |                               |     |     |                       |     |
|-----------------|-----|-------------------------------|-----|-----|-----------------------|-----|
| <i>Hs</i> PheRS | 349 | KYFSIDRVFRNETLDATHLA EFHQ IE  | 374 | 456 | AWGLS LERPTMIKY G     | 470 |
| <i>Mm</i> PheRS | 349 | KYFSIDRVFRNETLDATHLA EFHQ IE  | 374 | 456 | AWGLS LERPTMIKY G     | 470 |
| <i>Dr</i> PheRS | 349 | KYFSIDRVFRNETLDATHLA EFHQ IE  | 374 | 456 | AWGLS LERPTMIKY G     | 470 |
| <i>Dm</i> PheRS | 349 | KYFSIDK VFRNETLDATHLA EFHQ VE | 374 | 456 | AWGLS LERPTMIKY G     | 470 |
| <i>Ce</i> PheRS | 348 | KLFSIDRVFRNETLDATHLA EFHQ VE  | 373 | 455 | GYGLS LERPTMIKY G     | 469 |
| <i>Pf</i> PheRS | 440 | KYFSIDRVFRNENLDSTHLA EFHQ VE  | 465 | 547 | AWGLS LERPTMIKY N     | 561 |
| <i>At</i> PheRS | 280 | KYFSIDRVFRNEAVDRTHLA EFHQ IE  | 305 | 387 | AWGLS LERPTMIKY G     | 401 |
| <i>Sc</i> PheRS | 351 | RLFSIDRVFRNEAVDATHLA EFHQ VE  | 376 | 458 | GWGLS LERPTMIKY K     | 472 |
| <i>Bs</i> PheRS | 189 | KIICPGKVYRRDNDDATHSHQ FMO IE  | 214 | 309 | AFGMG VER I A M LKY G | 323 |
| <i>Ec</i> PheRS | 186 | RIIAPGRVYRNDYD-QTHTPM FHQ ME  | 210 | 294 | AFGMG MER L T M LRY G | 308 |

**H**

|                 |     |                              |     |     |                   |     |
|-----------------|-----|------------------------------|-----|-----|-------------------|-----|
| <i>Hs</i> GlyRS | 327 | GNSFRNEISPRSG--LIRVREFTMAE   | 350 | 576 | EPSFGLGRIMYTVFEH  | 591 |
| <i>Mm</i> GlyRS | 329 | GNSFRNEISPRSG--LIRVREFTMAE   | 352 | 578 | EPSFGLGRIMYTILEH  | 593 |
| <i>Dr</i> GlyRS | 367 | GNSFRNEISPRSG--LIRVREFTMAE   | 390 | 616 | EPSFGIGRIMYSIFEH  | 631 |
| <i>Dm</i> GlyRS | 273 | GNSFRNEISPRSG--LIRVREFTMAE   | 296 | 523 | EPSFGIGRIMYSLLEH  | 538 |
| <i>Ce</i> GlyRS | 273 | GLGFRNEISPRQGG--LIRVREFTMCE  | 296 | 522 | EPSYGIGRIMYALLEH  | 537 |
| <i>Pf</i> GlyRS | 464 | GLGFRNEISPRNG--LLRVREFQMAE   | 487 | 721 | EPSFGIGRLIFCILEH  | 736 |
| <i>At</i> GlyRS | 324 | GQAFRNEISPRQGG--LLRVREFTLAE  | 347 | 575 | EPSFGIGRIIYCLYEH  | 590 |
| <i>Sc</i> GlyRS | 256 | GKSF RNEISPRAG--LLRVREFTLMAE | 279 | 508 | EPSFGIGRIIYSVFEH  | 523 |
| <i>Bs</i> GlyRS | 54  | EPSRR-PADGRYGENPNRLYQHHQ FQ  | 78  | 156 | EITYGIERLAS YIQ-- | 171 |
| <i>Ec</i> GlyRS | 60  | QPSRR-PTDGRYGENPNRLQHYHQ FQ  | 84  | 162 | EITYGLERLAMYIQ--  | 177 |

**I**

|                 |     |                                                   |     |     |                             |     |
|-----------------|-----|---------------------------------------------------|-----|-----|-----------------------------|-----|
| <i>Hs</i> HisRS | 150 | YHIAKVYRRDNPAMTRGRYREFYQCD                        | 175 | 381 | GLS IGV ERIFSVIEQR          | 396 |
| <i>Mm</i> HisRS | 150 | YHIAKVYRRDNPAMTRGRYREFYQCD                        | 175 | 381 | GLS IGV ERIFSVIEQR          | 396 |
| <i>Dr</i> HisRS | 150 | YHIAKVYRRDNPAMTRGRYREFYQCD                        | 175 | 391 | GVSI G I ERVFSIMEQK         | 406 |
| <i>Dm</i> HisRS | 153 | YHIAKVYRRDNPAMTKGRYREFYQCD                        | 178 | 397 | GVSI G V ERIFSVLEAR         | 412 |
| <i>Ce</i> HisRS | 160 | YQIAKVYRRDQPVMSRGRYREFYQCD                        | 185 | 403 | GVSF G I ER LFAIMEAR        | 418 |
| <i>Pf</i> HisRS | 690 | FHIGKVYRRDEPSMNRGRFREFYQCD                        | 715 | 921 | GAS I G I ER I ITIAEEF      | 936 |
| <i>At</i> HisRS | 136 | YQIAKVYRRDNP--SKGRYREFYQCD                        | 159 | 356 | GMSL G I ERVFNIMEEL         | 371 |
| <i>Sc</i> HisRS | 149 | YHIAKVYRRDNPAMTKGRMREFYQCD                        | 174 | 399 | GISF G V ERIFSLIKQR         | 414 |
| <i>Bs</i> HisRS | 106 | YYVGP MFRYERP--QTGRYRQFYQFG                       | 129 | 305 | GFAM S I ER L L A A I D A E | 320 |
| <i>Ec</i> HisRS | 106 | WYI G P M F R H E R P - - Q K G R Y R Q F H Q L G | 129 | 304 | GFAM G L ER L V L L V Q A V | 319 |

**J**

|                 |     |                                |     |     |                    |     |
|-----------------|-----|--------------------------------|-----|-----|--------------------|-----|
| <i>Hs</i> AsnRS | 314 | VFCIAQSYRAEQSRTRRHLAEYTHVE     | 339 | 515 | GYGLGLERFLTWILNR   | 530 |
| <i>Mm</i> AsnRS | 325 | VFCIAQSYRAEQSRTRRHLAEYTHVE     | 350 | 526 | GYGLGLERFLSWILNR   | 541 |
| <i>Dr</i> AsnRS | 369 | TFCIAQSYRAEQSRTRRHLS EYTHIE    | 394 | 570 | GYGLGLERFLTWLLNR   | 585 |
| <i>Dm</i> AsnRS | 226 | TYTLSPA FRAENS K SPLHLAEFYMF E | 251 | 427 | GFGMG FERYLQLVTGV  | 442 |
| <i>Ce</i> AsnRS | 310 | VYCI SQSYRAEK SRTRRHLS EYQHVE  | 335 | 512 | GYGLGLERFICWLTDT   | 527 |
| <i>Pf</i> AsnRS | 370 | VYTFGPTFRAENSHTSRHLAEFWMIE     | 395 | 577 | GFGLG FERLIMLVTVGV | 592 |
| <i>At</i> AsnRS | 326 | VYTFGPTFRAENSNTSRHLAEFWMIE     | 351 | 534 | GFGLG FERLVQFVTGI  | 549 |
| <i>Sc</i> AsnRS | 319 | VYTIQESFRAEKSHTRRHLSEYTHIE     | 344 | 521 | YGIGT ERILAWLTCGR  | 536 |
| <i>Bs</i> AsnRS | 198 | VFSFGPTFRAEKSKTKRHLIEFWMIE     | 223 | 397 | GFGLG LERTVAWISGA  | 412 |
| <i>Ec</i> AsnRS | 226 | IYTFGPTFRAENSNTSRHLAEFWMLE     | 251 | 433 | GFGLG FERLIAYVTGV  | 448 |

**K**

|                 |     |   |   |   |   |   |   |   |   |   |   |   |   |   |   |   |   |   |   |   |   |   |   |   |   |   |   |     |     |   |   |   |   |   |   |   |   |   |   |   |   |   |   |   |     |     |
|-----------------|-----|---|---|---|---|---|---|---|---|---|---|---|---|---|---|---|---|---|---|---|---|---|---|---|---|---|---|-----|-----|---|---|---|---|---|---|---|---|---|---|---|---|---|---|---|-----|-----|
| <i>Hs</i> AspRS | 265 | V | F | S | I | G | P | V | F | R | A | E | D | S | N | T | H | R | H | L | T | E | F | V | G | L | D | 290 | 468 | G | G | I | G | L | E | R | V | T | M | L | F | L | G | L | 483 |     |
| <i>Mm</i> AspRS | 265 | V | F | C | I | G | P | V | F | R | A | E | D | S | N | T | H | R | H | L | T | E | F | V | G | L | D | 290 | 468 | G | G | I | G | L | E | R | V | T | M | L | F | L | G | L | 483 |     |
| <i>Dr</i> AspRS | 295 | V | F | C | V | G | P | V | F | R | A | E | D | S | N | T | H | R | H | L | T | E | F | V | G | L | D | 320 | 498 | G | G | I | G | L | E | R | V | T | M | L | Y | L | G | L | 513 |     |
| <i>Dm</i> AspRS | 295 | V | Y | T | V | G | A | V | F | R | A | E | D | S | N | T | H | R | H | L | T | E | F | V | G | L | D | 320 | 498 | G | G | I | G | M | E | R | V | V | M | L | Y | L | G | L | 513 |     |
| <i>Ce</i> AspRS | 295 | V | Y | T | I | G | P | V | F | R | A | E | D | S | N | T | H | R | H | M | T | E | F | V | G | L | D | 320 | 498 | G | G | I | G | L | E | R | V | T | M | L | F | L | G | L | 513 |     |
| <i>Pf</i> AspRS | 383 | V | F | E | V | G | P | V | F | R | A | E | N | S | N | T | Y | R | H | L | C | E | Y | V | S | L | D | 408 | 593 | G | C | G | I | G | L | E | R | V | L | M | L | F | L | G | L   | 608 |
| <i>At</i> AspRS | 296 | V | F | E | V | G | P | V | F | R | A | E | D | S | F | T | H | R | H | L | C | E | F | V | G | L | D | 321 | 499 | G | F | G | V | G | L | E | R | V | V | M | L | L | C | A | L   | 514 |
| <i>Sc</i> AspRS | 317 | V | Y | E | I | G | P | V | F | R | A | E | N | S | N | T | H | R | H | M | T | E | F | T | G | L | D | 342 | 524 | G | G | I | G | L | E | R | V | V | M | F | Y | L | D | L | 539 |     |
| <i>Bs</i> AspRS | 323 | V | V | K | A | I | N | V | K | G | G | A | G | D | Y | S | R | K | D | I | D | A | L | G | A | F | A | 348 | 533 | G | I | A | L | G | L | D | R | L | V | M | L | L | A | G | R   | 548 |
| <i>Ec</i> AspRS | 317 | R | V | A | A | L | R | V | P | G | G | A | S | - | L | T | R | K | Q | I | D | E | Y | G | N | F | V | 341 | 530 | G | L | A | F | G | L | D | R | L | T | M | L | T | G | T | 545 |     |

**Figure S2. Family Specific Variation at the ATP Binding Pocket, Related to Figure 2.**

**A.** The two classes of the 24 known aaRS families. **B.** Nine common class II aaRSs are superimposed with the bound ATP aligned. One representative ATP molecule is shown as black sticks. All proteins are shown as transparent cartoons. Three non-conserved residues at the bottom of ATP binding pocket are shown as sticks. Distances of ATP to *Hs*LysRS residues T337, G548, and G550 are indicated by black dashes. The structures are from pdb: (LysRS: 3BJU; SerRS: 4L87; ProRS: 4HVC; GlyRS: 2ZT5; ThrRS: 4HWT; HisRS: 4G84; PheRS: 3L4G; AsnRS: 2XGT; AspRS: 4J15). **C-K.** Sequence alignments of motifs 2 and 3 of 9 class II tRNA synthetases. *Hs*, *Homo sapiens*; *Mm*, *Mus musculus*; *Dr*, *Danio rerio*; *Dm*, *Drosophila melanogaster*; *Ce*, *Caenorhabditis elegans*; *Pf*, *Plasmodium falciparum*; *At*, *Arabidopsis thaliana*; *Sc*, *Saccharomyces cerevisiae*; *Bs*, *Bacillus subtilis*; *Ec*, *Escherichia coli*. CP-binding compatible residues are indicated by green boxes; CP-repulsive residues are indicated by red boxes; and interaction-missing residues are indicated by yellow boxes.



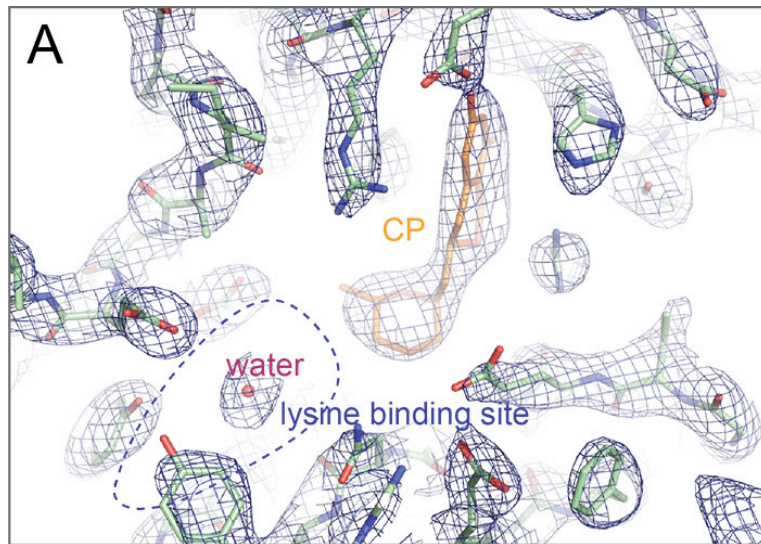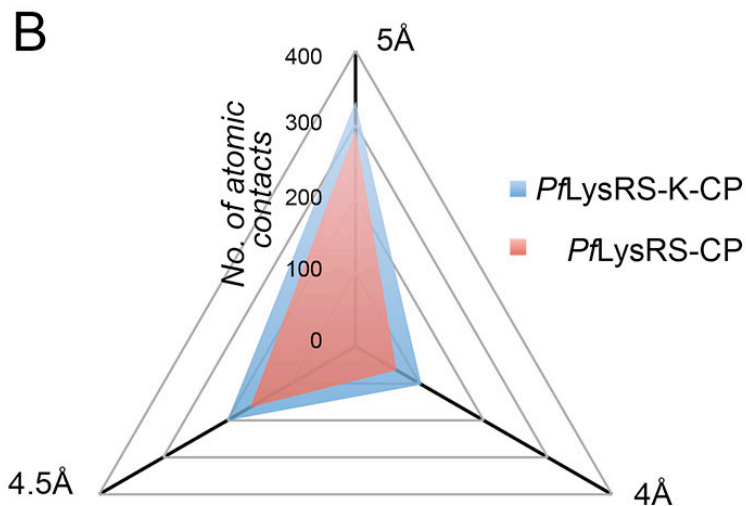

**Figure S3. Cooperative Binding of CP and Lysine to *PfLysRS*, Related to Figure 4.**

**A.** 2Fo-Fc electron density of the CP binding site in *PfLysRS* is shown as blue meshes with  $1.5\sigma$ . CP molecule is shown as orange sticks. Protein is shown as light green sticks. A water molecule is shown as a red ball. The lysine-binding site is indicated by dashed circle. **B.** Radar plot of total number of atomic contacts between *PfLysRS* and CP with (blue) or without (red) lysine. Three different resolution cut-offs are used. CP binds to *PfLysRS* with ~20% decreased atomic contacts in the absence of lysine.

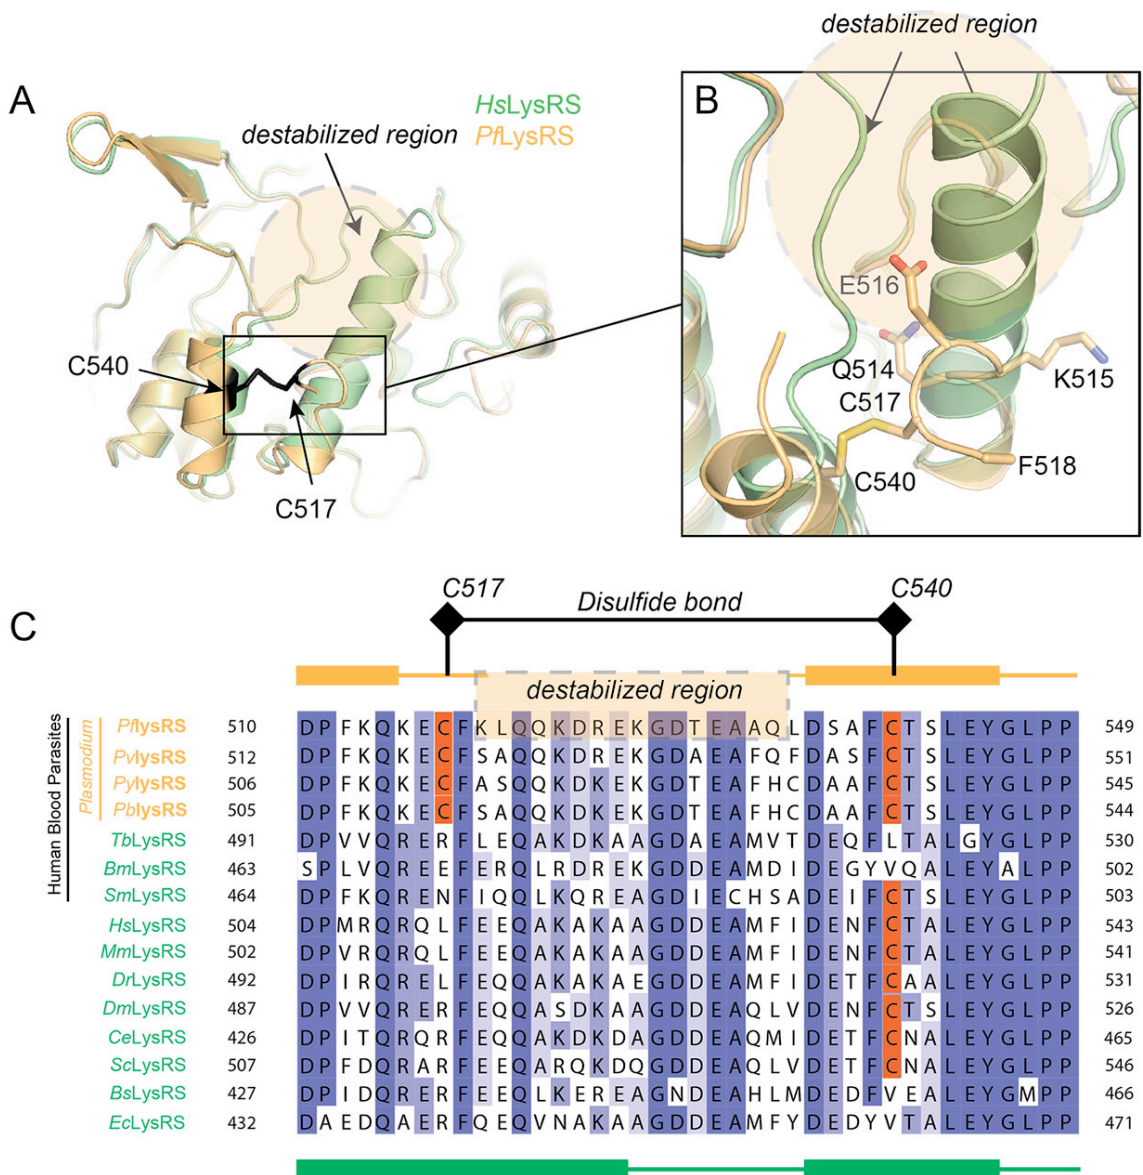

**Figure S4. *PfLysRS* Specific Disulfide Bond Destabilizes the Structure, Related to Figure 4.**

**A.** Superimposition of *PfLysRS* (light orange) and *HsLysRS* (light green). The *PfLysRS* specific disulfide bond is shown as black sticks. The destabilized region is cycled by dashes. **B.** Zoom-in view of the *Plasmodium* specific C517-C540 disulfide bond. The enclosed region of 518-535 is completely disordered in the *PfLysRS* structure. Nearby residues are also shown as sticks. **C.** Sequence alignment of LysRSs in the region enclosed by the *Plasmodium* specific disulfide bond. *Pf*, *Plasmodium falciparum*; *Pv*, *Plasmodium vivax*; *Py*, *Plasmodium yoelii*; *Pb*, *Plasmodium berghei*; *Bm*, *Babesia microti*; *Tb*, *Trypanosoma brucei*; *Sm*, *Schistosoma mansoni*; *Hs*, *Homo sapiens*; *Mm*,

*Mus musculus*; *Dr*, *Danio rerio*; *Dm*, *Drosophila melanogaster*; *Ce*, *Caenorhabditis elegans*; *Sc*, *Saccharomyces cerevisiae*; *Bs*, *Bacillus subtilis*; *Ec*, *Escherichia coli*.
